# Supplementary material
Source: PubMed Central journal article supplement (PMC6753943)
Supplement: NIHMS1009380-supplement-Supplemental.pdf [file NIHMS1009380-supplement-Supplemental.pdf]

Thank you for your interest in this questionnaire study on the potential relationship between psychedelic substances and reduction or cessation of cigarette smoking. This research is being conducted by scientists at Johns Hopkins University School of Medicine and has been approved by the Johns Hopkins University Institutional Review Board (IRB).

### **Our Previous Research**

Our research team has already conducted surveys characterizing positive and challenging experiences after taking psychedelics in nonlaboratory settings. We've also studied both positive and psychologically difficult experiences, as well as headaches, after giving psilocybin to volunteers in our laboratory.

### **Purpose of This Study**

The goal of this survey is to learn more information about whether psychedelic drugs are associated with reduction or cessation of cigarette smoking. We want to characterize people's experiences in non-laboratory settings in which taking a psychedelic may have led to reducing or quitting smoking. For the purposes of this survey, we will be asking specifically about individuals who have quit smoking cigarettes or reduced their smoking (even temporarily) after experiences with psilocybin (magic) mushrooms, LSD, morning glory seeds, mescaline, peyote cactus, San Pedro cactus, DMT, or ayahuasca. *Please only count substances listed here.*

### **Inclusion Criteria**

You are invited to participate in this survey if you fulfill all of the three criteria listed below.

- 1) You are at least 18 years old.
- 2) You read and write English fluently.
- 3) You have taken a psychedelic substance outside of an official university or hospital study, and experienced a reduction or cessation in subsequent cigarette smoking (even temporarily).

### **What the Study Entails**

Participation in this study involves filling out an online survey that will take approximately 45 minutes. You will be required to complete the survey in one sitting.

### **Why should I participate?**

We believe that this study is scientifically important. We would like you to participate because we need to collect responses from many different people. You may find this survey interesting. There is also a chance that you will be bored. Although there is no monetary compensation for participation, you will be making a unique and important contribution to science.

**Is my participation confidential?**

Yes. We do not collect identifying information such as your name, email address, or IP address. Your anonymous responses will be seen and analyzed by Johns Hopkins staff or representatives. To further protect the confidentiality of participants, the results of most questions will be presented in aggregate. We may quote from your textual responses. However, if you provide specific identifying information, we will edit your responses to protect your confidentiality.

**What kind of information will I be providing?**

At the beginning of the survey, you will be asked questions about your background, smoking and drug use history. Psychological questionnaires are also included to assess relationships between constructs of interest and their relevance to smoking cessation and/or psychedelic use.

**What will become of the results from this study?**

The researchers intend to publish the results from this study in the scientific literature and to present results at scientific meetings. We will also make the results publicly available by posting a notice of any scholarly publications on the website of the Council on Spiritual Practices ([www.csp.org](http://www.csp.org)).

**Your responses will not be used in this study if you do not complete the survey.**

Your participation in this study is voluntary. Your completing the survey will serve as your consent to be in the study. Even after you begin the survey, you may stop answering the questions at any time. If you stop early, none of your responses will be used. At the end of the survey, you will have a final opportunity to consent, or not, to all of your responses being submitted.

**How do I start?**

You can begin the survey by clicking 'Begin survey' at the bottom of this page. This survey will take approximately 45 minutes. You will be required to complete the survey in one sitting.

It is important that you complete the survey only once, and that you answer each question honestly and seriously. If you are not ready to complete the survey now, please return to this page at a time that is convenient for you.

You can exit the survey at any time by clicking the link in the upper right corner of your screen. If you exit the survey early, your responses will not be used.

During the survey, **please do not hit the "back" button** on your internet browser as it may erase your answers or prematurely terminate your session.

By clicking 'Begin survey' below, you affirm that:

- you have read the information above,
- you voluntarily agree to participate,
- you are at least 18 years old,
- you read and write English fluently,
- you have taken a psychedelic substance outside of an official university or hospital study, and experienced a reduction or cessation in subsequent cigarette smoking (even temporarily).

1. Please click below to begin or exit the survey.

- Begin survey
- Exit Survey

2. Have you completed this survey before?

Yes

No

3. Do you read, write, and speak English fluently?

Yes

No

4. Are you 18 years old or older?

Yes

No

5. How did you hear about this survey?

DMT-Nexus

Erowid.org

MAPS.org

Shroomery.org

Reality Sandwich

Google Adwords

Facebook/Social Media

Other (please specify)

6. What is your sex?

Male

Female

7. In what year were you born?

8. What is the highest level of education you have completed?

- Some high school or less
- High school diploma or equivalent
- Some college
- College degree
- Some graduate/professional school
- Graduate/professional degree

9. What is your marital status?

- Single
- In a committed relationship (not married)
- Married
- Separated
- Divorced
- Widowed

10. In what country do you currently live?

11. In which state do you currently reside?

12. Which of the following best describes your racial background?

- American Indian/Alaska Native (a person having origins in any of the original peoples of North, Central, and South America)
- Asian (a person having origins in any of the original peoples of the Far East, Southeast Asia, or the Indian subcontinent)
- Native Hawaiian or Pacific Islander (a person having origins in any of the original peoples of Hawaii, Guam, Samoa, or other Pacific Islands)
- Black or African American (a person having origins in any of the Black racial groups of Africa)
- White (a person having origins in any of the original peoples of Europe, the Middle East, or North Africa)
- Some other race
- More than one race
- Prefer not to answer

13. Are you Hispanic or Latino? ('Hispanic' or 'Latino' refers to a person of Cuban, Mexican, Puerto Rican, South or Central American, or other Spanish culture or origin, regardless of race).

- Yes
- No
- Prefer not to answer

14. What is your total annual household income (in \$US dollars)?

- Less than \$10,000
- \$10,000 to \$19,999
- \$20,000 to \$29,999
- \$30,000 to \$39,999
- \$40,000 to \$49,999
- \$50,000 to \$59,999
- \$60,000 to \$69,999
- \$70,000 to \$79,999
- \$80,000 to \$89,999
- \$90,000 to \$99,999
- \$100,000 to \$149,999
- \$150,000 or more

15. What is your current occupation?

16. Have you struggled with anxiety, depression, a substance dependence disorder other than nicotine dependence, or another psychiatric disorder of some kind (e.g., schizophrenia) at any point in your life?

Yes

No

17. Please mark all psychiatric disorders you have struggled with or been diagnosed with.

Anxiety Disorder (Social Anxiety, Panic, Phobia, PTSD, etc.)

Mood Disorder (Depression, Mania, Bipolar, etc.)

Psychotic Disorder (Schizophrenia, Schizoaffective, etc.)

Eating Disorder (Anorexia, Bulimia, etc.)

Impulse Control Disorder (Pyromania, Compulsive Gambling, etc.)

Substance-Related Disorder (Alcohol or Drug Dependence)

Personality Disorder (Paranoid, Avoidant, Borderline, etc.)

Other (please specify)

18. Are you a regular user of any of the following medications or drugs? Select all that apply.

- Tobacco (nicotine)
- Alcohol
- Cannabis (marijuana)
- Cocaine
- Methamphetamine
- Opioids (e.g., heroin, morphine, Oxycontin, Vicodin, etc.)
- Prescription stimulants (e.g., Adderall, Ritalin, etc.)
- Benzodiazepines (Xanax, Valium, Klonopin, etc.)
- Prescription antidepressants (Celexa, Cymbalta, Effexor, Prozac, Zoloft, etc.)
- "Bath salt" drug products
- Synthetic marijuana (K2, Spice, etc.)
- I do not use any of these medications or drugs regularly.

Other (please specify)

19. On how many separate occasions have you taken one or more of these specific substances: psilocybin mushrooms, LSD, morning glory seeds, mescaline, peyote cactus, San Pedro cactus, DMT, or ayahuasca? Mark all that apply.

|                           | Never                 | 1 occasion            | 2 - 5 separate occasions | 6 - 10 separate occasions | 11 - 20 separate occasions | 21 - 50 separate occasions | 51 - 100 separate occasions | 101 - 300 separate occasions | More than 300 separate occasions |
|---------------------------|-----------------------|-----------------------|--------------------------|---------------------------|----------------------------|----------------------------|-----------------------------|------------------------------|----------------------------------|
| psilocybin mushrooms      | <input type="radio"/> | <input type="radio"/> | <input type="radio"/>    | <input type="radio"/>     | <input type="radio"/>      | <input type="radio"/>      | <input type="radio"/>       | <input type="radio"/>        | <input type="radio"/>            |
| LSD                       | <input type="radio"/> | <input type="radio"/> | <input type="radio"/>    | <input type="radio"/>     | <input type="radio"/>      | <input type="radio"/>      | <input type="radio"/>       | <input type="radio"/>        | <input type="radio"/>            |
| morning glory seeds       | <input type="radio"/> | <input type="radio"/> | <input type="radio"/>    | <input type="radio"/>     | <input type="radio"/>      | <input type="radio"/>      | <input type="radio"/>       | <input type="radio"/>        | <input type="radio"/>            |
| mescaline (pure compound) | <input type="radio"/> | <input type="radio"/> | <input type="radio"/>    | <input type="radio"/>     | <input type="radio"/>      | <input type="radio"/>      | <input type="radio"/>       | <input type="radio"/>        | <input type="radio"/>            |
| peyote cactus             | <input type="radio"/> | <input type="radio"/> | <input type="radio"/>    | <input type="radio"/>     | <input type="radio"/>      | <input type="radio"/>      | <input type="radio"/>       | <input type="radio"/>        | <input type="radio"/>            |
| San Pedro cactus          | <input type="radio"/> | <input type="radio"/> | <input type="radio"/>    | <input type="radio"/>     | <input type="radio"/>      | <input type="radio"/>      | <input type="radio"/>       | <input type="radio"/>        | <input type="radio"/>            |
| DMT (pure compound)       | <input type="radio"/> | <input type="radio"/> | <input type="radio"/>    | <input type="radio"/>     | <input type="radio"/>      | <input type="radio"/>      | <input type="radio"/>       | <input type="radio"/>        | <input type="radio"/>            |
| ayahuasca                 | <input type="radio"/> | <input type="radio"/> | <input type="radio"/>    | <input type="radio"/>     | <input type="radio"/>      | <input type="radio"/>      | <input type="radio"/>       | <input type="radio"/>        | <input type="radio"/>            |

20. How old were you when you first took a psychedelic substance?

21. What was the first psychedelic you ever tried? (Please do not count MDMA or cannabis.)

- psilocybin mushrooms
- LSD
- morning glory seeds
- mescaline (pure compound)
- peyote cactus
- San Pedro cactus
- DMT (pure compound)
- ayahuasca

Other (please specify)

22. How old were you when you most recently took a psychedelic substance?

23. What was the psychedelic substance you used most recently?

- psilocybin mushrooms
- LSD
- morning glory seeds
- mescaline (pure compound)
- peyote cactus
- San Pedro cactus
- DMT (pure compound)
- ayahuasca
- Other

Other (please specify)

Select whether each item is true or false for you.



24. Sometimes I feel and experience things as I did when I was a child.

True

False

25. I can be greatly moved by eloquent or poetic language.

True

False

26. While watching a movie, a TV show, or a play, I may become so involved that I may forget about myself and my surroundings and experience the story as if it were real and as if I were taking part in it.

True

False

27. If I stare at a picture and then look away from it, I can sometimes “see” an image of the picture almost as if I were still looking at it.

True

False

28. Sometimes I feel as if my mind could envelop the whole world.

True

False

29. I like to watch cloud shapes change in the sky.

True

False

30. If I wish I can imagine (or daydream) some things so vividly that they hold my attention as a good movie or story does.

True

False

31. I think I really know what some people mean when they talk about mystical experiences.

True

False

32. I sometimes "step outside" my usual self and experience an entirely different state of being.

True

False

33. Textures- such as wool, sand, wood - sometimes remind me of colors or music.

True

False

34. Sometimes I experience things as if they were doubly real.

True

False

35. When I listen to music I can get so caught up in it that I don't notice anything else.

True

False

36. If I wish I can imagine that my body is so heavy that I could not move it if I wanted to.

True

False

37. I can often somehow sense the presence of another person before I actually see her/him.

True

False

38. The crackle and flames of a wood fire stimulate my imagination.

True

False

39. It is sometimes possible for me to be completely immersed in nature or in art and feel as if my whole state of consciousness has somehow been temporarily altered.

True

False

40. Different colors have distinctive and special meanings for me.

True

False

41. I am able to wander off into my thoughts while doing a routine task and actually forget that I am doing the task, and then find a few minutes later that I have completed it.

True

False

42. I can sometimes recollect certain past experiences in my life with such clarity and vividness that it is like living them again or almost so.

True

False

43. Things that might seem meaningless to others often make sense to me.

True

False

44. While acting in a play I think I could really feel the emotions of the character and “become” her/him for the time being, forgetting both myself and the audience.

True

False

45. My thoughts often don’t occur as words but as visual images.

True

False

46. I often take delight in small things (like the five-pointed star shape that appears when you cut an apple across the core or the colors in soap bubbles).

True

False

47. When listening to organ music or other powerful music I sometimes feel as if I am being lifted into the air.

True

False

48. Sometimes I can change noise into music by the way that I listen to it.

True

False

49. Some of my most vivid memories are called up by scents and smells.

True

False

50. Some music reminds me of pictures or changing color patterns.

True

False

51. I often know what someone is going to say before he or she says it.

True

False

52. I often have "physical memories;" for example, after I have been swimming I may still feel as if I am still in the water.

True

False

53. The sound of a voice can be so fascinating to me that I can just go on listening to it.

True

False

54. At times I somehow feel the presence of someone who is not there.

True

False

55. Sometimes thoughts and images come to me without the slightest effort on my part.

True

False

56. I find that different odors have different colors.

True

False

57. I can be deeply moved by a sunset.

True

False

**Using the scale provided as a guide, indicate how much you agree or disagree with each of the following statements. Give only one answer for each statement.**

58. I am often confused about what emotion I am feeling.

Strongly disagree

Moderately disagree

Neither disagree nor agree

Moderately agree

Strongly agree

59. It is difficult for me to find the right words for my feelings.

Strongly disagree

Moderately disagree

Neither disagree nor agree

Moderately agree

Strongly agree

60. I have physical sensations that even doctors don't understand.

- Strongly disagree
- Moderately disagree
- Neither disagree nor agree
- Moderately agree
- Strongly agree

61. I am able to describe my feelings easily.

- Strongly disagree
- Moderately disagree
- Neither disagree nor agree
- Moderately agree
- Strongly agree

62. I prefer to analyze problems rather than just describe them.

- Strongly disagree
- Moderately disagree
- Neither disagree nor agree
- Moderately agree
- Strongly agree

63. When I am upset, I don't know if I am sad, frightened, or angry.

- Strongly disagree
- Moderately disagree
- Neither disagree nor agree
- Moderately agree
- Strongly agree

64. I am often puzzled by sensations in my body.

- Strongly disagree
- Moderately disagree
- Neither disagree nor agree
- Moderately agree
- Strongly agree

65. I prefer to just let things happen rather than to understand why they turned out that way.

- Strongly disagree
- Moderately disagree
- Neither disagree nor agree
- Moderately agree
- Strongly agree

66. I have feelings that I can't quite identify.

- Strongly disagree
- Moderately disagree
- Neither disagree nor agree
- Moderately agree
- Strongly agree

67. Being in touch with emotions is essential.

- Strongly disagree
- Moderately disagree
- Neither disagree nor agree
- Moderately agree
- Strongly agree

68. I find it hard to describe how I feel about people.

- Strongly disagree
- Moderately disagree
- Neither disagree nor agree
- Moderately agree
- Strongly agree

69. People tell me to describe my feelings more.

- Strongly disagree
- Moderately disagree
- Neither disagree nor agree
- Moderately agree
- Strongly agree

70. I don't know what's going on inside me.

- Strongly disagree
- Moderately disagree
- Neither disagree nor agree
- Moderately agree
- Strongly agree

71. I often don't know why I am angry.

- Strongly disagree
- Moderately disagree
- Neither disagree nor agree
- Moderately agree
- Strongly agree



72. I prefer talking to people about their daily activities rather than their feelings.

- Strongly disagree
- Moderately disagree
- Neither disagree nor agree
- Moderately agree
- Strongly agree

73. I prefer to watch "light" entertainment shows rather than psychological dramas.

- Strongly disagree
- Moderately disagree
- Neither disagree nor agree
- Moderately agree
- Strongly agree

74. It is difficult for me to reveal my innermost feelings, even to close friends.

- Strongly disagree
- Moderately disagree
- Neither disagree nor agree
- Moderately agree
- Strongly agree

75. I can feel close to someone, even in moments of silence.

- Strongly disagree
- Moderately disagree
- Neither disagree nor agree
- Moderately agree
- Strongly agree

76. I find examination of my feelings useful in solving personal problems.

- Strongly disagree
- Moderately disagree
- Neither disagree nor agree
- Moderately agree
- Strongly agree

77. Looking for hidden meanings in movies or plays distracts from enjoyment.

- Strongly disagree
- Moderately disagree
- Neither disagree nor agree
- Moderately agree
- Strongly agree

**For each of the next 9 choices, please choose which reward you would prefer: the smaller reward today, or the larger reward in the specified number of days. Please take the choices seriously. Although the choices are pretend and you won't receive the money, please make each decision as if it were really for money.**

78. Would you prefer \$19 today, or \$25 in 53 days?

- \$19 today
- \$25 in 53 days

79. Would you prefer \$14 today, or \$25 in 19 days?

- \$14 today
- \$25 in 19 days

80. Would you prefer \$15 today, or \$35 in 13 days?

- \$15 today
- \$35 in 13 days

81. Would you prefer \$11 today, or \$30 in 7 days?

- \$11 today
- \$30 in 7 days

82. Would you prefer \$34 today, or \$35 in 186 days?

- \$34 today
- \$35 in 186 days

83. Would you prefer \$24 today, or \$35 in 29 days?

- \$24 today
- \$35 in 29 days

84. Would you prefer \$28 today, or \$30 in 179 days?

- \$28 today
- \$30 in 179 days

85. Would you prefer \$25 today, or \$30 in 80 days?

- \$25 today
- \$30 in 80 days

86. Would you prefer \$22 today, or \$25 in 136 days?

- \$22 today
- \$25 in 136 days

**For each of the next 9 choices, please choose which reward you would prefer: the smaller reward today, or the larger reward in the specified number of days. Please take the choices seriously. Although the choices are pretend and you won't receive the consequences, please make each decision as if it were for real consequences.**

**For these questions you will be asked about your preference for durations of improved health. By improved health, we mean that you are less likely to catch a cold or other infection, you get better quality sleep, you feel more well rested and energetic, you have less of a cough, and you feel more fit overall.**

87. Would you prefer 19 days of improved health starting today, or 25 days of improved health starting in 53 days?

- 19 days of improved health starting today
- 25 days of improved health starting in 53 days

88. Would you prefer 14 days of improved health starting today, or 25 days of improved health starting in 19 days?

- 14 days of improved health starting today
- 25 days of improved health starting in 19 days

89. Would you prefer 15 days of improved health starting today, or 35 days of improved health starting in 13 days?

- 15 days of improved health starting today
- 35 days of improved health starting in 13 days

90. Would you prefer 11 days of improved health starting today, or 30 days of improved health starting in 7 days?

- 11 days of improved health starting today
- 30 days of improved health starting in 7 days

91. Would you prefer 34 days of improved health starting today, or 35 days of improved health starting in 186 days?

- 34 days of improved health starting today
- 35 days of improved health starting in 186 days

92. Would you prefer 24 days of improved health starting today, or 35 days of improved health starting in 29 days?

- 24 days of improved health starting today
- 35 days of improved health starting in 29 days

93. Would you prefer 28 days of improved health starting today, or 30 days of improved health starting in 179 days?

- 28 days of improved health starting today
- 30 days of improved health starting in 179 days

94. Would you prefer 25 days of improved health starting today, or 30 days of improved health starting in 80 days?

- 25 days of improved health starting today
- 30 days of improved health starting in 80 days

95. Would you prefer 22 days of improved health starting today, or 25 days of improved health starting in 136 days?

- 22 days of improved health starting today
- 25 days of improved health starting in 136 days

**Please answer these items regarding your smoking habits in the 6 months prior to your psychedelic-occasioned smoking cessation or reduction.**

96. In the 6 months prior to your psychedelic-occasioned smoking cessation or reduction, how soon after waking up did you want to smoke your first cigarette?

- Within 5 minutes
- 6-30 minutes
- 31-60 minutes
- After 60 minutes

97. In the 6 months prior to your psychedelic-occasioned smoking cessation or reduction, did you find it difficult to refrain from smoking in places where it is forbidden (e.g. in church, at the library, at the movies, etc.)?

- Yes
- No

98. In the 6 months prior to your psychedelic-occasioned smoking cessation or reduction, which cigarette would you hate most to give up?

- The first one in the morning
- All others

99. In the 6 months prior to your psychedelic-occasioned smoking cessation or reduction, how many cigarettes/day did you smoke on a typical day?

100. In the 6 months prior to your psychedelic-occasioned smoking cessation or reduction, did you smoke more frequently during the first hours after waking than during the rest of the day?

Yes

No

101. In the 6 months prior to your psychedelic-occasioned smoking cessation or reduction, did you smoke if you were so ill that you were in bed most of the day?

Yes

No

102. Are you currently smoking?

Yes

No

103. How old were you when you first started smoking cigarettes?

104. Have you smoked a cigarette, even a puff, during the past 7 days?

Yes

No

105. Have you smoked a cigarette, even a puff, during the past month?

Yes

No

106. Were you smoking 6 months ago?

Yes

No

107. Were you smoking 12 months ago?

Yes

No

108. Which of the following have you used in your past efforts to quit smoking? (Check all that apply):

- Cold turkey (quitting all at once)
- Gradually cutting down
- Nicorette gum
- Nicotine Patch
- E-cigarette
- Professional stop smoking clinic
- Counseling provided by a "Quit-line" telephone number
- Counseling provided by a website (for example, American Lung Association)
- Hypnosis
- Acupuncture
- Support group
- Self-help manuals or books
- Varenicline (Chantix)
- Bupropion (Wellbutrin / Zyban)
- None of these

Other (please specify)

109. After your psychedelic-occasioned smoking cessation or reduction, how serious were each of the following problems?

|                             | Not at All            | A little              | Moderately            | Very                  | Extremely             |
|-----------------------------|-----------------------|-----------------------|-----------------------|-----------------------|-----------------------|
| Weight gain                 | <input type="radio"/> |
| Increased eating            | <input type="radio"/> |
| Digestive problems          | <input type="radio"/> |
| Nausea                      | <input type="radio"/> |
| Headaches                   | <input type="radio"/> |
| Drowsiness                  | <input type="radio"/> |
| Depression or low mood      | <input type="radio"/> |
| Fatigue                     | <input type="radio"/> |
| Insomnia                    | <input type="radio"/> |
| Difficulty concentrating    | <input type="radio"/> |
| Heart pounding, or sweating | <input type="radio"/> |
| Irritability                | <input type="radio"/> |
| Restlessness                | <input type="radio"/> |
| Anxiety                     | <input type="radio"/> |
| Craving for tobacco         | <input type="radio"/> |

Other (please specify)

110. Prior to your psychedelic-occasioned smoking cessation or reduction, how many times in your life have you made a serious attempt to quit smoking (i.e., attempts lasting at least 1 day)?



111. After your psychedelic-occasioned smoking cessation or reduction, how serious were each of these problems *in comparison to your previous quit attempts?*

|                             | Much Less<br>Severe   | Less Severe           | Same                  | More Severe           | Much More<br>Severe   | Not Applicable        |
|-----------------------------|-----------------------|-----------------------|-----------------------|-----------------------|-----------------------|-----------------------|
| Weight gain                 | <input type="radio"/> |
| Increased eating            | <input type="radio"/> |
| Digestive problems          | <input type="radio"/> |
| Nausea                      | <input type="radio"/> |
| Headaches                   | <input type="radio"/> |
| Drowsiness                  | <input type="radio"/> |
| Depression or low mood      | <input type="radio"/> |
| Fatigue                     | <input type="radio"/> |
| Insomnia                    | <input type="radio"/> |
| Difficulty concentrating    | <input type="radio"/> |
| Heart pounding, or sweating | <input type="radio"/> |
| Irritability                | <input type="radio"/> |
| Restlessness                | <input type="radio"/> |
| Anxiety                     | <input type="radio"/> |
| Craving for tobacco         | <input type="radio"/> |

Comments

112. Other than your psychedelic-occasioned smoking cessation or reduction, what was the longest period of time that you were able to stay off cigarettes?

- Less than 1 week
- 1-2 weeks
- 2-4 weeks
- 1-3 months
- 3-6 months
- 6-12 months
- 1-2 years
- 2-5 years
- 5-10 years
- 10-20 years
- More than 20 years

Other (please specify)

113. How many years did you smoke before quitting?

Other (please specify)

114. During the period you were smoking the most, about how many cigarettes did you smoke on a typical day?

115. How confident are you that you will be able to resist the urge to smoke altogether in the future, regardless of the situation?

**THINK BACK TO THE PERIOD BEFORE YOUR PSYCHEDELIC-OCCASIONED SMOKING CESSATION OR REDUCTION (WHEN YOU WERE A REGULAR SMOKER) AND RESPOND TO THE FOLLOWING QUESTIONS FROM THAT MINDSET. Indicate how strongly you would have agreed or disagreed with each statement regarding cigarette smoking.**

116. In the 6 months prior to my psychedelic-occasioned smoking cessation or reduction, smoking would have made me feel really good at a time such as now.

- Strongly disagree
- Moderately disagree
- Slightly disagree
- Cannot decide
- Slightly agree
- Moderately agree
- Strongly agree

117. In the 6 months prior to my psychedelic-occasioned smoking cessation or reduction, I would have been less irritable if I smoked at a time such as now.

- Strongly disagree
- Moderately disagree
- Slightly disagree
- Cannot decide
- Slightly agree
- Moderately agree
- Strongly agree

118. In the 6 months prior to my psychedelic-occasioned smoking cessation or reduction, nothing would have been better than smoking a cigarette at a time such as now.

- Strongly disagree
- Moderately disagree
- Slightly disagree
- Cannot decide
- Slightly agree
- Moderately agree
- Strongly agree

119. In the 6 months prior to my psychedelic-occasioned smoking cessation or reduction, I would not have been missing smoking at a time such as now.

- Strongly disagree
- Moderately disagree
- Slightly disagree
- Cannot decide
- Slightly agree
- Moderately agree
- Strongly agree

120. In the 6 months prior to my psychedelic-occasioned smoking cessation or reduction, I would have smoked as soon as I got a chance at a time such as now.

- Strongly disagree
- Moderately disagree
- Slightly disagree
- Cannot decide
- Slightly agree
- Moderately agree
- Strongly agree

121. In the 6 months prior to my psychedelic-occasioned smoking cessation or reduction, I wouldn't have wanted to smoke at a time such as now.

- Strongly disagree
- Moderately disagree
- Slightly disagree
- Cannot decide
- Slightly agree
- Moderately agree
- Strongly agree

122. In the 6 months prior to my psychedelic-occasioned smoking cessation or reduction, smoking would have made me less depressed at a time such as now.

- Strongly disagree
- Moderately disagree
- Slightly disagree
- Cannot decide
- Slightly agree
- Moderately agree
- Strongly agree

123. In the 6 months prior to my psychedelic-occasioned smoking cessation or reduction, smoking would not have helped me calm down at a time such as now.

- Strongly disagree
- Moderately disagree
- Slightly disagree
- Cannot decide
- Slightly agree
- Moderately agree
- Strongly agree

124. In the 6 months prior to my psychedelic-occasioned smoking cessation or reduction, if I were offered a cigarette at a time such as now, I would have smoked it immediately.

- Strongly disagree
- Moderately disagree
- Slightly disagree
- Cannot decide
- Slightly agree
- Moderately agree
- Strongly agree

125. In the 6 months prior to my psychedelic-occasioned smoking cessation or reduction, I could have gone without smoking a cigarette for a long time starting at a time such as now.

- Strongly disagree
- Moderately disagree
- Slightly disagree
- Cannot decide
- Slightly agree
- Moderately agree
- Strongly agree

126. In the 6 months prior to my psychedelic-occasioned smoking cessation or reduction, smoking a cigarette would not have been pleasant at a time such as now.

- Strongly disagree
- Moderately disagree
- Slightly disagree
- Cannot decide
- Slightly agree
- Moderately agree
- Strongly agree

127. In the 6 months prior to my psychedelic-occasioned smoking cessation or reduction, if I would have been smoking at a time such as now, I would have felt less bored.

- Strongly disagree
- Moderately disagree
- Slightly disagree
- Cannot decide
- Slightly agree
- Moderately agree
- Strongly agree

128. In the 6 months prior to my psychedelic-occasioned smoking cessation or reduction, all I would have wanted at a time such as now would have been a cigarette.

- Strongly disagree
- Moderately disagree
- Slightly disagree
- Cannot decide
- Slightly agree
- Moderately agree
- Strongly agree

129. In the 6 months prior to my psychedelic-occasioned smoking cessation or reduction, smoking would have made me feel less tired at a time such as now.

- Strongly disagree
- Moderately disagree
- Slightly disagree
- Cannot decide
- Slightly agree
- Moderately agree
- Strongly agree

130. In the 6 months prior to my psychedelic-occasioned smoking cessation or reduction, smoking would have made me feel happier at a time such as now.

- Strongly disagree
- Moderately disagree
- Slightly disagree
- Cannot decide
- Slightly agree
- Moderately agree
- Strongly agree

131. In the 6 months prior to my psychedelic-occasioned smoking cessation or reduction, even if it were possible, I probably wouldn't have smoked at a time such as now.

- Strongly disagree
- Moderately disagree
- Slightly disagree
- Cannot decide
- Slightly agree
- Moderately agree
- Strongly agree

132. In the 6 months prior to my psychedelic-occasioned smoking cessation or reduction, I would have had no desire for a cigarette at a time such as now.

- Strongly disagree
- Moderately disagree
- Slightly disagree
- Cannot decide
- Slightly agree
- Moderately agree
- Strongly agree

133. In the 6 months prior to my psychedelic-occasioned smoking cessation or reduction, my desire to smoke would have seemed overpowering at a time such as now.

- Strongly disagree
- Moderately disagree
- Slightly disagree
- Cannot decide
- Slightly agree
- Moderately agree
- Strongly agree



134. In the 6 months prior to my psychedelic-occasioned smoking cessation or reduction, smoking would have made things seem just perfect at a time such as now.

- Strongly disagree
- Moderately disagree
- Slightly disagree
- Cannot decide
- Slightly agree
- Moderately agree
- Strongly agree

135. In the 6 months prior to my psychedelic-occasioned smoking cessation or reduction, I would have craved a cigarette at a time such as now.

- Strongly disagree
- Moderately disagree
- Slightly disagree
- Cannot decide
- Slightly agree
- Moderately agree
- Strongly agree

136. In the 6 months prior to my psychedelic-occasioned smoking cessation or reduction, I would not have enjoyed a cigarette at a time such as now.

- Strongly disagree
- Moderately disagree
- Slightly disagree
- Cannot decide
- Slightly agree
- Moderately agree
- Strongly agree

137. In the 6 months prior to my psychedelic-occasioned smoking cessation or reduction, a cigarette would not have tasted good at a time such as now.

- Strongly disagree
- Moderately disagree
- Slightly disagree
- Cannot decide
- Slightly agree
- Moderately agree
- Strongly agree

138. In the 6 months prior to my psychedelic-occasioned smoking cessation or reduction, I would have had an urge for a cigarette at a time such as now.

- Strongly disagree
- Moderately disagree
- Slightly disagree
- Cannot decide
- Slightly agree
- Moderately agree
- Strongly agree

139. In the 6 months prior to my psychedelic-occasioned smoking cessation or reduction, I could have controlled things better at a time such as now if I could smoke.

- Strongly disagree
- Moderately disagree
- Slightly disagree
- Cannot decide
- Slightly agree
- Moderately agree
- Strongly agree

140. In the 6 months prior to my psychedelic-occasioned smoking cessation or reduction, I would have smoked as soon as possible at a time such as now.

- Strongly disagree
- Moderately disagree
- Slightly disagree
- Cannot decide
- Slightly agree
- Moderately agree
- Strongly agree

141. In the 6 months prior to my psychedelic-occasioned smoking cessation or reduction, I would not have felt better physically if I were smoking at a time such as now.

- Strongly disagree
- Moderately disagree
- Slightly disagree
- Cannot decide
- Slightly agree
- Moderately agree
- Strongly agree

142. In the 6 months prior to my psychedelic-occasioned smoking cessation or reduction, a cigarette would not have been very satisfying at a time such as now.

- Strongly disagree
- Moderately disagree
- Slightly disagree
- Cannot decide
- Slightly agree
- Moderately agree
- Strongly agree

143. In the 6 months prior to my psychedelic-occasioned smoking cessation or reduction, if I had a lit cigarette in my hand at a time such as now I probably would have smoked it.

- Strongly disagree
- Moderately disagree
- Slightly disagree
- Cannot decide
- Slightly agree
- Moderately agree
- Strongly agree

144. In the 6 months prior to my psychedelic-occasioned smoking cessation or reduction, if I had been smoking at a time such as now I could think more clearly.

- Strongly disagree
- Moderately disagree
- Slightly disagree
- Cannot decide
- Slightly agree
- Moderately agree
- Strongly agree

145. In the 6 months prior to my psychedelic-occasioned smoking cessation or reduction, I would have done almost anything for a cigarette at a time such as now.

- Strongly disagree
- Moderately disagree
- Slightly disagree
- Cannot decide
- Slightly agree
- Moderately agree
- Strongly agree

146. In the 6 months prior to my psychedelic-occasioned smoking cessation or reduction, I would have needed to smoke at a time such as now.

- Strongly disagree
- Moderately disagree
- Slightly disagree
- Cannot decide
- Slightly agree
- Moderately agree
- Strongly agree

147. In the 6 months prior to my psychedelic-occasioned smoking cessation or reduction, I would not have been making plans to smoke at a time such as now.

- Strongly disagree
- Moderately disagree
- Slightly disagree
- Cannot decide
- Slightly agree
- Moderately agree
- Strongly agree

**THINK BACK TO THE PERIOD BEFORE YOUR PSYCHEDELIC-OCCASIONED SMOKING CESSATION OR REDUCTION (WHEN YOU WERE A REGULAR SMOKER) AND RESPOND TO THE FOLLOWING QUESTIONS FROM THAT MINDSET.**

We would like to know how many cigarettes you would have purchased for a 24 hour period at a time such as now in the 6 months prior to your psychedelic-occasioned smoking cessation or reduction. Although cigarettes are usually sold in packs of 20, we would like you to pretend that you are purchasing cigarettes individually. Assume that these cigarettes are the only ones available to you. You cannot purchase cigarettes (or other tobacco/nicotine products) except those you choose below. Also, assume that the cigarettes are for your smoking only – you can't sell cigarettes or give them to anyone else. You can't save them either – you must smoke the cigarettes you purchase within 24 hours. Please consider each question independently – if you purchase cigarettes at one price, please do not assume you have those cigarettes when you provide your answer at another price.

In the space provided, please indicate how many cigarettes you would have purchased at each of the prices listed.

148. If the price of one cigarette were \$ 0.01, how many cigarettes would you have purchased for a 24 hour period in the 6 months prior to your psychedelic-occasioned smoking cessation or reduction?

149. If the price of one cigarette were \$ 0.02, how many cigarettes would you have purchased for a 24 hour period in the 6 months prior to your psychedelic-occasioned smoking cessation or reduction?

150. If the price of one cigarette were \$ 0.05, how many cigarettes would you have purchased for a 24 hour period in the 6 months prior to your psychedelic-occasioned smoking cessation or reduction?

151. If the price of one cigarette were \$ 0.10, how many cigarettes would you have purchased for a 24 hour period in the 6 months prior to your psychedelic-occasioned smoking cessation or reduction?

152. If the price of one cigarette were \$ 0.25, how many cigarettes would you have purchased for a 24 hour period in the 6 months prior to your psychedelic-occasioned smoking cessation or reduction?

153. If the price of one cigarette were \$ 0.50, how many cigarettes would you have purchased for a 24 hour period in the 6 months prior to your psychedelic-occasioned smoking cessation or reduction?

154. If the price of one cigarette were \$ 1.00, how many cigarettes would you have purchased for a 24 hour period in the 6 months prior to your psychedelic-occasioned smoking cessation or reduction?

155. If the price of one cigarette were \$ 2.50, how many cigarettes would you have purchased for a 24 hour period in the 6 months prior to your psychedelic-occasioned smoking cessation or reduction?

156. If the price of one cigarette were \$ 5.00, how many cigarettes would you have purchased for a 24 hour period in the 6 months prior to your psychedelic-occasioned smoking cessation or reduction?

157. If the price of one cigarette were \$ 10.00, how many cigarettes would you have purchased for a 24 hour period in the 6 months prior to your psychedelic-occasioned smoking cessation or reduction?

158. If the price of one cigarette were \$ 25.00, how many cigarettes would you have purchased for a 24 hour period in the 6 months prior to your psychedelic-occasioned smoking cessation or reduction?

159. If the price of one cigarette were \$ 50.00, how many cigarettes would you have purchased for a 24 hour period in the 6 months prior to your psychedelic-occasioned smoking cessation or reduction?

160. If the price of one cigarette were \$ 100.00, how many cigarettes would you have purchased for a 24 hour period in the 6 months prior to your psychedelic-occasioned smoking cessation or reduction?

161. If the price of one cigarette were \$ 250.00, how many cigarettes would you have purchased for a 24 hour period in the 6 months prior to your psychedelic-occasioned smoking cessation or reduction?

162. If the price of one cigarette were \$ 500.00, how many cigarettes would you have purchased for a 24 hour period in the 6 months prior to your psychedelic-occasioned smoking cessation or reduction?

163. If the price of one cigarette were \$ 1,000.00, how many cigarettes would you have purchased for a 24 hour period in the 6 months prior to your psychedelic-occasioned smoking cessation or reduction?

164. If the price of one cigarette were \$ 2,500.00, how many cigarettes would you have purchased for a 24 hour period in the 6 months prior to your psychedelic-occasioned smoking cessation or reduction?

**NOW ANSWER THE FOLLOWING QUESTIONS FROM YOUR CURRENT, PRESENT DAY PERSPECTIVE. Indicate how strongly you agree or disagree with each statement regarding cigarette smoking.**

165. Smoking would make me feel really good right now.

- Strongly disagree
- Moderately disagree
- Slightly disagree
- Cannot decide
- Slightly agree
- Moderately agree
- Strongly agree

166. I would be less irritable now if I smoke.

- Strongly disagree
- Moderately disagree
- Slightly disagree
- Cannot decide
- Slightly agree
- Moderately agree
- Strongly agree

167. Nothing would be better than smoking a cigarette right now.

- Strongly disagree
- Moderately disagree
- Slightly disagree
- Cannot decide
- Slightly agree
- Moderately agree
- Strongly agree



168. I am not missing smoking right now.

- Strongly disagree
- Moderately disagree
- Slightly disagree
- Cannot decide
- Slightly agree
- Moderately agree
- Strongly agree

169. I will smoke as soon as I get a chance.

- Strongly disagree
- Moderately disagree
- Slightly disagree
- Cannot decide
- Slightly agree
- Moderately agree
- Strongly agree

170. I don't want to smoke now.

- Strongly disagree
- Moderately disagree
- Slightly disagree
- Cannot decide
- Slightly agree
- Moderately agree
- Strongly agree

171. Smoking would make me less depressed.

- Strongly disagree
- Moderately disagree
- Slightly disagree
- Cannot decide
- Slightly agree
- Moderately agree
- Strongly agree

172. Smoking would not help me calm down now.

- Strongly disagree
- Moderately disagree
- Slightly disagree
- Cannot decide
- Slightly agree
- Moderately agree
- Strongly agree

173. If I were offered a cigarette, I would smoke it immediately.

- Strongly disagree
- Moderately disagree
- Slightly disagree
- Cannot decide
- Slightly agree
- Moderately agree
- Strongly agree

174. Starting now, I could go without smoking a cigarette for a long time.

- Strongly disagree
- Moderately disagree
- Slightly disagree
- Cannot decide
- Slightly agree
- Moderately agree
- Strongly agree

175. Smoking a cigarette would not be pleasant.

- Strongly disagree
- Moderately disagree
- Slightly disagree
- Cannot decide
- Slightly agree
- Moderately agree
- Strongly agree

176. If I were smoking this minute, I would feel less bored.

- Strongly disagree
- Moderately disagree
- Slightly disagree
- Cannot decide
- Slightly agree
- Moderately agree
- Strongly agree

177. All I want right now is a cigarette.

- Strongly disagree
- Moderately disagree
- Slightly disagree
- Cannot decide
- Slightly agree
- Moderately agree
- Strongly agree

178. Smoking right now would make me feel less tired.

- Strongly disagree
- Moderately disagree
- Slightly disagree
- Cannot decide
- Slightly agree
- Moderately agree
- Strongly agree

179. Smoking would make me feel happier now.

- Strongly disagree
- Moderately disagree
- Slightly disagree
- Cannot decide
- Slightly agree
- Moderately agree
- Strongly agree

180. Even if it were possible, I probably wouldn't smoke now.

- Strongly disagree
- Moderately disagree
- Slightly disagree
- Cannot decide
- Slightly agree
- Moderately agree
- Strongly agree

181. I have no desire for a cigarette right now.

- Strongly disagree
- Moderately disagree
- Slightly disagree
- Cannot decide
- Slightly agree
- Moderately agree
- Strongly agree

182. My desire to smoke seems overpowering.

- Strongly disagree
- Moderately disagree
- Slightly disagree
- Cannot decide
- Slightly agree
- Moderately agree
- Strongly agree

183. Smoking would make things seem just perfect.

- Strongly disagree
- Moderately disagree
- Slightly disagree
- Cannot decide
- Slightly agree
- Moderately agree
- Strongly agree

184. I crave a cigarette right now.

- Strongly disagree
- Moderately disagree
- Slightly disagree
- Cannot decide
- Slightly agree
- Moderately agree
- Strongly agree

185. I would not enjoy a cigarette right now.

- Strongly disagree
- Moderately disagree
- Slightly disagree
- Cannot decide
- Slightly agree
- Moderately agree
- Strongly agree

186. A cigarette would not taste good right now.

- Strongly disagree
- Moderately disagree
- Slightly disagree
- Cannot decide
- Slightly agree
- Moderately agree
- Strongly agree

187. I have an urge for a cigarette.

- Strongly disagree
- Moderately disagree
- Slightly disagree
- Cannot decide
- Slightly agree
- Moderately agree
- Strongly agree

188. I could control things better right now if I could smoke.

- Strongly disagree
- Moderately disagree
- Slightly disagree
- Cannot decide
- Slightly agree
- Moderately agree
- Strongly agree

189. I am going to smoke as soon as possible.

- Strongly disagree
- Moderately disagree
- Slightly disagree
- Cannot decide
- Slightly agree
- Moderately agree
- Strongly agree

190. I would not feel better physically if I were smoking.

- Strongly disagree
- Moderately disagree
- Slightly disagree
- Cannot decide
- Slightly agree
- Moderately agree
- Strongly agree

191. A cigarette would not be very satisfying right now.

- Strongly disagree
- Moderately disagree
- Slightly disagree
- Cannot decide
- Slightly agree
- Moderately agree
- Strongly agree



192. If I had a lit cigarette in my hand I probably would smoke it.

- Strongly disagree
- Moderately disagree
- Slightly disagree
- Cannot decide
- Slightly agree
- Moderately agree
- Strongly agree

193. If I were smoking now I could think more clearly.

- Strongly disagree
- Moderately disagree
- Slightly disagree
- Cannot decide
- Slightly agree
- Moderately agree
- Strongly agree

194. I would do almost anything for a cigarette now.

- Strongly disagree
- Moderately disagree
- Slightly disagree
- Cannot decide
- Slightly agree
- Moderately agree
- Strongly agree

195. I need to smoke now.

- Strongly disagree
- Moderately disagree
- Slightly disagree
- Cannot decide
- Slightly agree
- Moderately agree
- Strongly agree

196. Right now, I am not making plans to smoke.

- Strongly disagree
- Moderately disagree
- Slightly disagree
- Cannot decide
- Slightly agree
- Moderately agree
- Strongly agree

**ANSWER THE FOLLOWING QUESTIONS FROM YOUR CURRENT, PRESENT DAY PERSPECTIVE.**

**We would like to know how many cigarettes you would purchase for a 24 hour period starting now. Although cigarettes are usually sold in packs of 20, we would like you to pretend that you are purchasing cigarettes individually. Assume that these cigarettes are the only ones available to you. You cannot purchase cigarettes (or other tobacco/nicotine products) except those you choose below. Also, assume that the cigarettes are for your smoking only – you can't sell cigarettes or give them to anyone else. You can't save them either – you must smoke the cigarettes you purchase within 24 hours. Please consider each question independently – if you purchase cigarettes at one price, please do not assume you have those cigarettes when you provide your answer at another price.**

**In the space provided, please indicate how many cigarettes you would purchase at each of the prices listed.**

197. If the price of one cigarette were \$ 0.01, how many cigarettes would you purchase now for a 24 hour period?

198. If the price of one cigarette were \$ 0.02, how many cigarettes would you purchase now for a 24 hour period?

199. If the price of one cigarette were \$ 0.05, how many cigarettes would you purchase now for a 24 hour period?

200. If the price of one cigarette were \$ 0.10, how many cigarettes would you purchase now for a 24 hour period?

201. If the price of one cigarette were \$ 0.25, how many cigarettes would you purchase now for a 24 hour period?

202. If the price of one cigarette were \$ 0.50, how many cigarettes would you purchase now for a 24 hour period?

203. If the price of one cigarette were \$ 1.00, how many cigarettes would you purchase now for a 24 hour period?

204. If the price of one cigarette were \$ 2.50, how many cigarettes would you purchase now for a 24 hour period?

205. If the price of one cigarette were \$ 5.00, how many cigarettes would you purchase now for a 24 hour period?

206. If the price of one cigarette were \$ 10.00, how many cigarettes would you purchase now for a 24 hour period?

207. If the price of one cigarette were \$ 25.00, how many cigarettes would you purchase now for a 24 hour period?

208. If the price of one cigarette were \$ 50.00, how many cigarettes would you purchase now for a 24 hour period?

209. If the price of one cigarette were \$ 100.00, how many cigarettes would you purchase now for a 24 hour period?

210. If the price of one cigarette were \$ 250.00, how many cigarettes would you purchase now for a 24 hour period?

211. If the price of one cigarette were \$ 500.00, how many cigarettes would you purchase now for a 24 hour period?

212. If the price of one cigarette were \$ 1,000.00, how many cigarettes would you purchase now for a 24 hour period?

213. If the price of one cigarette were \$ 2,500.00, how many cigarettes would you purchase now for a 24 hour period?

214. During the psychedelic session prior to your smoking cessation or reduction, would you say that you had a profound, personally meaningful experience?

Yes

No

215. How personally meaningful was the experience?

- No more than routine, everyday experiences
- Similar to meaningful experiences that occur on average once a week
- Similar to meaningful experiences that occur on average once a month
- Similar to meaningful experiences that occur on average once a year
- Similar to meaningful experiences that occur on average once every 5 years
- Among the 10 most meaningful experiences of my life
- Among the 5 most meaningful experiences of my life
- The single most meaningful experience of my life

216. During the psychedelic session prior to your smoking cessation or reduction, would you say that you had a 'spiritual or mystical experience' that is, a moment of sudden spiritual awakening or insight?

- Yes
- No

217. Indicate the degree to which the experience was spiritually significant to you:

- Not at all
- Slightly
- Moderately
- Very much
- Among the 5 most spiritually significant experiences of my life
- The single most spiritually significant experience of my life

**Looking back on the psychedelic experience that occurred prior to your smoking reduction or cessation, please rate the degree to which at any time during that session, you experienced the following phenomena:**

218. Loss of your usual sense of time.

- None; not at all
- So slight cannot decide
- Slight
- Moderate
- Strong
- Extreme

219. Experience of amazement.

- None; not at all
- So slight cannot decide
- Slight
- Moderate
- Strong
- Extreme

220. Sense that the experience cannot be described adequately in words.

- None; not at all
- So slight cannot decide
- Slight
- Moderate
- Strong
- Extreme

221. Gain of insightful knowledge experienced at an intuitive level.

- None; not at all
- So slight cannot decide
- Slight
- Moderate
- Strong
- Extreme

222. Feeling that you experienced eternity or infinity.

- None; not at all
- So slight cannot decide
- Slight
- Moderate
- Strong
- Extreme

223. Experience of oneness or unity with objects and/or persons perceived in your surroundings.

- None; not at all
- So slight cannot decide
- Slight
- Moderate
- Strong
- Extreme

224. Loss of your usual sense of space.

- None; not at all
- So slight cannot decide
- Slight
- Moderate
- Strong
- Extreme

225. Feelings of tenderness and gentleness.

- None; not at all
- So slight cannot decide
- Slight
- Moderate
- Strong
- Extreme

226. Certainty of encounter with ultimate reality (in the sense of being able to “know” and “see” what is really real at some point during your experience).

- None; not at all
- So slight cannot decide
- Slight
- Moderate
- Strong
- Extreme

227. Feeling that you could not do justice to your experience by describing it in words.

- None; not at all
- So slight cannot decide
- Slight
- Moderate
- Strong
- Extreme

228. Loss of usual awareness of where you were.

- None; not at all
- So slight cannot decide
- Slight
- Moderate
- Strong
- Extreme

229. Feelings of peace and tranquility.

- None; not at all
- So slight cannot decide
- Slight
- Moderate
- Strong
- Extreme



230. Sense of being “outside of” time, beyond past and future.

- None; not at all
- So slight cannot decide
- Slight
- Moderate
- Strong
- Extreme

231. Freedom from the limitations of your personal self and feeling a unity or bond with what was felt to be greater than your personal self.

- None; not at all
- So slight cannot decide
- Slight
- Moderate
- Strong
- Extreme

232. Sense of being at a spiritual height.

- None; not at all
- So slight cannot decide
- Slight
- Moderate
- Strong
- Extreme

233. Experience of pure being and pure awareness (beyond the world of sense impressions).

- None; not at all
- So slight cannot decide
- Slight
- Moderate
- Strong
- Extreme

234. Experience of ecstasy.

- None; not at all
- So slight cannot decide
- Slight
- Moderate
- Strong
- Extreme

235. Experience of the insight that “all is One”.

- None; not at all
- So slight cannot decide
- Slight
- Moderate
- Strong
- Extreme

236. Being in a realm with no space boundaries.

- None; not at all
- So slight cannot decide
- Slight
- Moderate
- Strong
- Extreme

237. Experience of oneness in relation to an “inner world” within.

- None; not at all
- So slight cannot decide
- Slight
- Moderate
- Strong
- Extreme

238. Sense of reverence.

- None; not at all
- So slight cannot decide
- Slight
- Moderate
- Strong
- Extreme

239. Experience of timelessness.

- None; not at all
- So slight cannot decide
- Slight
- Moderate
- Strong
- Extreme

240. You are convinced now, as you look back on your experience, that in it you encountered ultimate reality (i.e., that you “knew” and “saw” what was really real).

- None; not at all
- So slight cannot decide
- Slight
- Moderate
- Strong
- Extreme

241. Feeling that you experienced something profoundly sacred and holy.

- None; not at all
- So slight cannot decide
- Slight
- Moderate
- Strong
- Extreme

242. Awareness of the life or living presence in all things.

- None; not at all
- So slight cannot decide
- Slight
- Moderate
- Strong
- Extreme

243. Experience of the fusion of your personal self into a larger whole.

- None; not at all
- So slight cannot decide
- Slight
- Moderate
- Strong
- Extreme

244. Sense of awe or awesomeness.

- None; not at all
- So slight cannot decide
- Slight
- Moderate
- Strong
- Extreme

245. Experience of unity with ultimate reality.

- None; not at all
- So slight cannot decide
- Slight
- Moderate
- Strong
- Extreme

246. Feeling that it would be difficult to communicate your own experience to others who have not had similar experiences.

- None; not at all
- So slight cannot decide
- Slight
- Moderate
- Strong
- Extreme

247. Feelings of joy.

- None; not at all
- So slight cannot decide
- Slight
- Moderate
- Strong
- Extreme

248. Which substance led to the psychedelic experience associated with your smoking cessation or reduction?

- psilocybin mushrooms
- LSD
- morning glory seeds
- mescaline
- peyote cactus
- San Pedro cactus
- DMT
- ayahuasca

Other (please specify)

249. What was the approximate dose ingested to the best of your knowledge?

250. How old were you when this experience took place?

251. Where did this experience take place? (Check all that apply):

- At home
- At a party
- In a public place (e.g., shopping mall, movie theater, etc.)
- At a concert or festival
- Outdoors in nature
- In a religious or spiritual setting (e.g., ceremony, retreat, etc.)

Other (please specify)

252. Were you alone or with other people during the majority of this psychedelic session?

- Alone
- With 1 other person
- With a few other people (2 - 5)
- With a small group of people (6 - 20)
- At a medium-sized gathering (21 - 100)
- At a large gathering (more than 100 people)

253. At any time during your session, did you intentionally close your eyes or cover your eyes (for example with your hand, an eye shade, eye mask, or blindfold)?

- Yes
- No

254. During your session, how long were your eyes closed or covered (as described in the previous question)?

- Less than 10 minutes
- 10 - 30 minutes
- 30 - 60 minutes
- 1 - 2 hours
- More than 2 hours
- Can't decide or don't know

255. Please provide a brief description of the psychedelic experience that led to your quitting or reducing smoking.

256. What was your intention in this particular instance for taking a psychedelic? (Check all that apply):

- I took a psychedelic only because other people were, but I did not have a serious intention.
- Curiosity without any other serious intention.
- Recreational (e.g., to enjoy the experience, which may or may not involve a social recreational event such as a concert).
- A serious intention for psychological self-exploration (e.g., resolve a personal issue or to increase self-understanding).
- A serious intention to explore spirituality or the sacred (e.g., to contemplate God, as you understand that word, or the nature of ultimate reality, and so on).
- Other (please specify)

257. Did you go into this experience with a premeditated intention to quit or reduce smoking?

- Yes
- No

258. Please rank items in order of their importance to your psychedelic-occasioned smoking reduction or cessation.

|                                                                                                                                                 |                                         |
|-------------------------------------------------------------------------------------------------------------------------------------------------|-----------------------------------------|
| <input style="width: 50px;" type="text"/> Strengthening your belief in your own ability to quit.                                                | <input type="checkbox"/> Not applicable |
| <input style="width: 50px;" type="text"/> Reducing stress involved with quitting.                                                               | <input type="checkbox"/> Not applicable |
| <input style="width: 50px;" type="text"/> Reframing quitting as a spiritual task.                                                               | <input type="checkbox"/> Not applicable |
| <input style="width: 50px;" type="text"/> Changing life priorities or values, such that smoking was no longer more important than quitting.     | <input type="checkbox"/> Not applicable |
| <input style="width: 50px;" type="text"/> Changing your orientation toward the future, so that long-term benefits outweighed immediate desires. | <input type="checkbox"/> Not applicable |
| <input style="width: 50px;" type="text"/> Increasing space between the desire to smoke and taking action.                                       | <input type="checkbox"/> Not applicable |



259. Please describe any additional reasons (not listed above) that your psychedelic experience may have contributed to your quitting or reducing smoking.

A large, empty rectangular box with a thin black border, intended for the respondent to write their answer to question 259.

260. Besides your psychedelic experience, did you use any other methods to help maintain smoking abstinence or reduction during or after your psychedelic-occasioned smoking cessation or reduction? (Check all that apply):

- None
- Nicorette gum
- Nicotine Patch
- E-cigarette
- Professional stop smoking clinic
- Counseling provided by a "Quit-line" telephone number
- Counseling provided by a website (for example, American Lung Association)
- Hypnosis
- Acupuncture
- Support group
- Self-help manuals or books
- Varenicline (Chantix)
- Bupropion (Wellbutrin / Zyban)
- Other (please specify)

261. Please characterize your cigarette smoking since this psychedelic experience.

- Have stopped smoking completely (Total abstinence from cigarettes).
- Have smoked very rarely (One cigarette a month or less).
- Have smoked at a significantly reduced rate (One cigarette a week or less).
- Have smoked much less than before (One cigarette a day or less).
- Have smoked less than before (More than one cigarette a day).
- Stopped or reduced smoking for a period of time, then returned to smoking same amount as before.

Other / comments

262. For how long after your psychedelic session did you stop or reduce smoking? Please include any relevant details in the "Other / comments" text box.

- Less than 1 week
- 1-2 weeks
- 2-4 weeks
- 1-3 months
- 3-6 months
- 6-12 months
- 1-2 years
- 2-5 years
- 5-10 years
- 10-20 years
- More than 20 years

Other / comments:

263. Did you experience any other behavioral changes after this psychedelic session? (Check all that apply):

- None
- Reduced or quit drinking alcohol
- Reduced or quit other drugs (If applicable, please list drugs in comment box below)
- Changes in diet
- Changes in physical activity / exercise
- Changes in relationships
- Changes in career / work

Other / comments

264. Did you experience any negative effects from this psychedelic session?

- Yes
- No
- Not sure

265. Please describe any negative or potentially negative effects you may have experienced as a result of this psychedelic session.

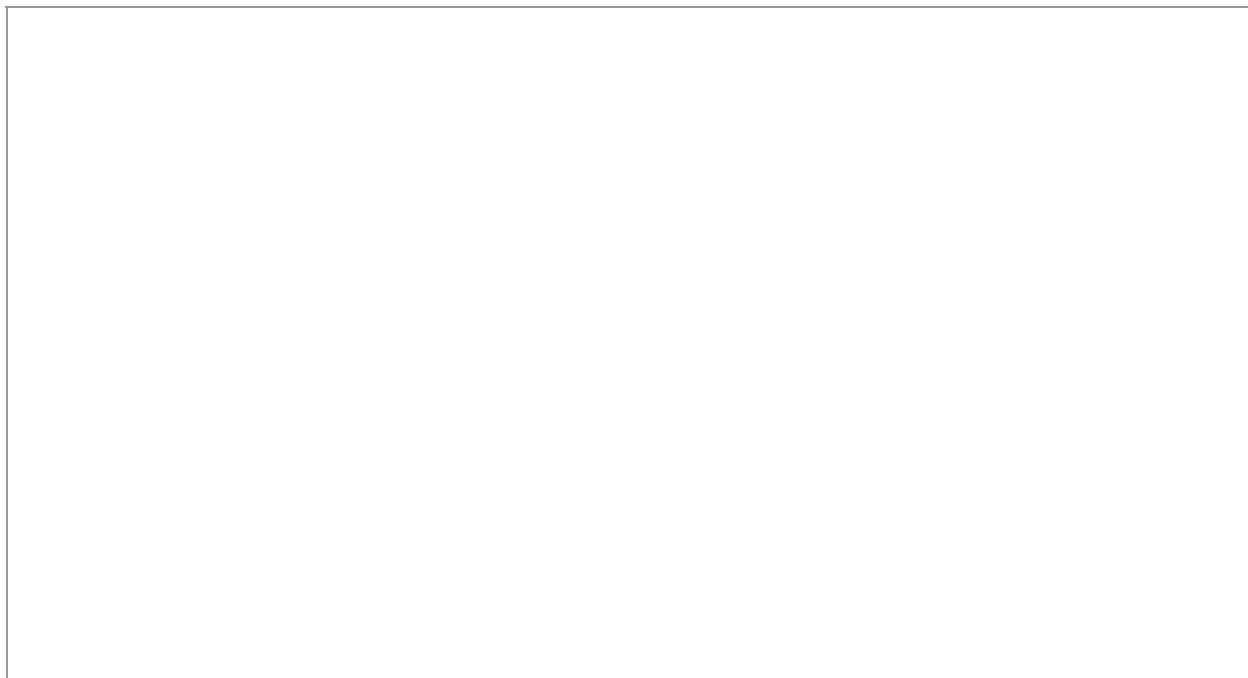

266. Was your quitting or reducing smoking the result of a single or multiple psychedelic sessions?

- Single Session
- Multiple Sessions

267. If your smoking cessation or reduction was the result of multiple psychedelic sessions, please describe the process, including substances ingested, number of sessions, and length of time between sessions.

268. Did you have any computer problems that prevented you from answering some of the questions on this survey?

Yes

No

269. Did you have trouble understanding any of the questions on this survey?

Yes

No

270. Do you have anything to add about psychedelics or your experiences using them that you think would be valuable to know?



Thank you very much for your time and participation. Please feel free to share this survey with any potentially interested parties. Have a nice day!
